# Supplementary material for: Comparative analysis of Cd-responsive maize and rice transcriptomes highlights Cd co-modulated orthologs
Source: PubMed Central journal article supplement (PMC6158873; doi:10.1186/s12864-018-5109-8), 2018-09-26

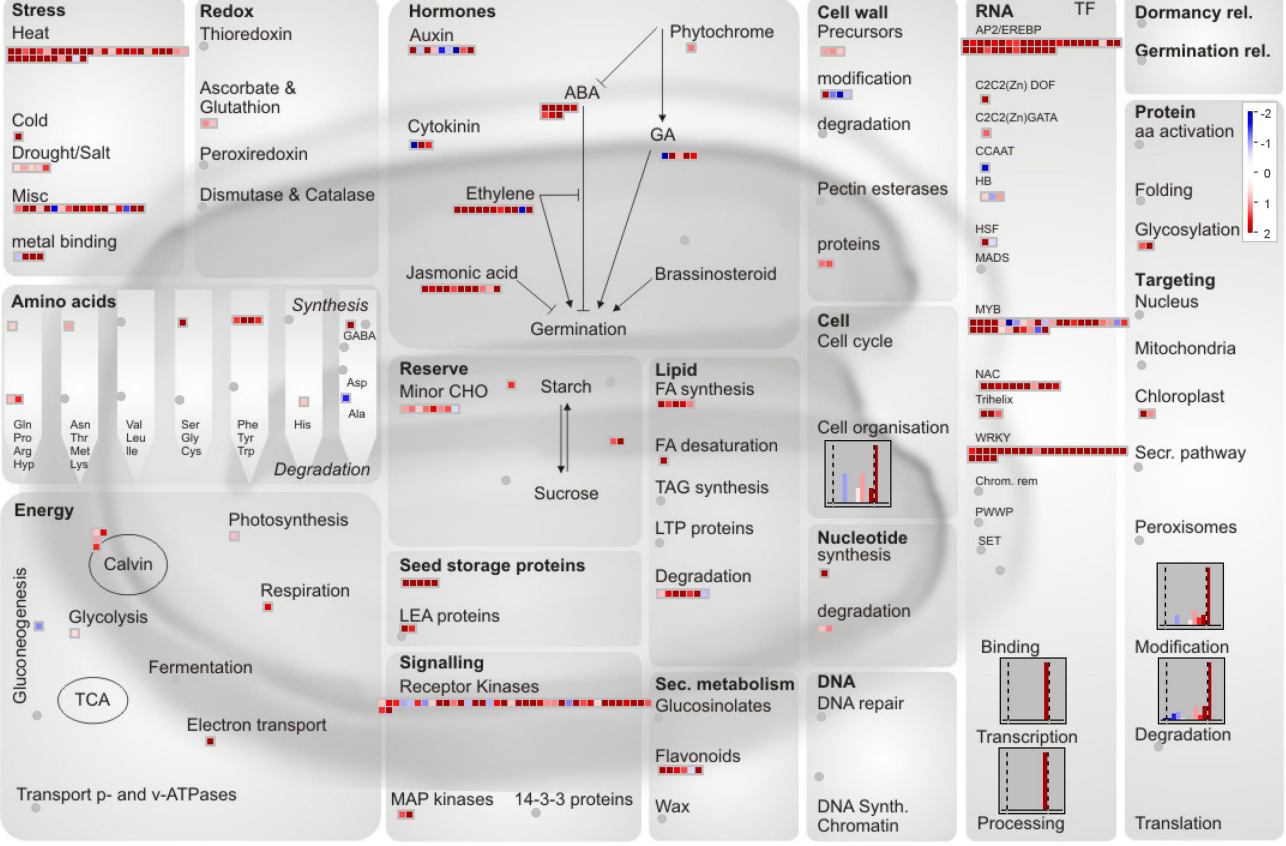

Supplement: 12864_2018_5109_MOESM7_ESM.pdf [file 12864_2018_5109_MOESM7_ESM.pdf]
